# Supplementary figures and images for: Levels of domain-specific physical activity at work, in the household, for travel and for leisure among 327 789 adults from 104 countries
Source: HighWire-hosted journal article supplement (doi:10.1136/bjsports-2020-102601), 2020-11-25

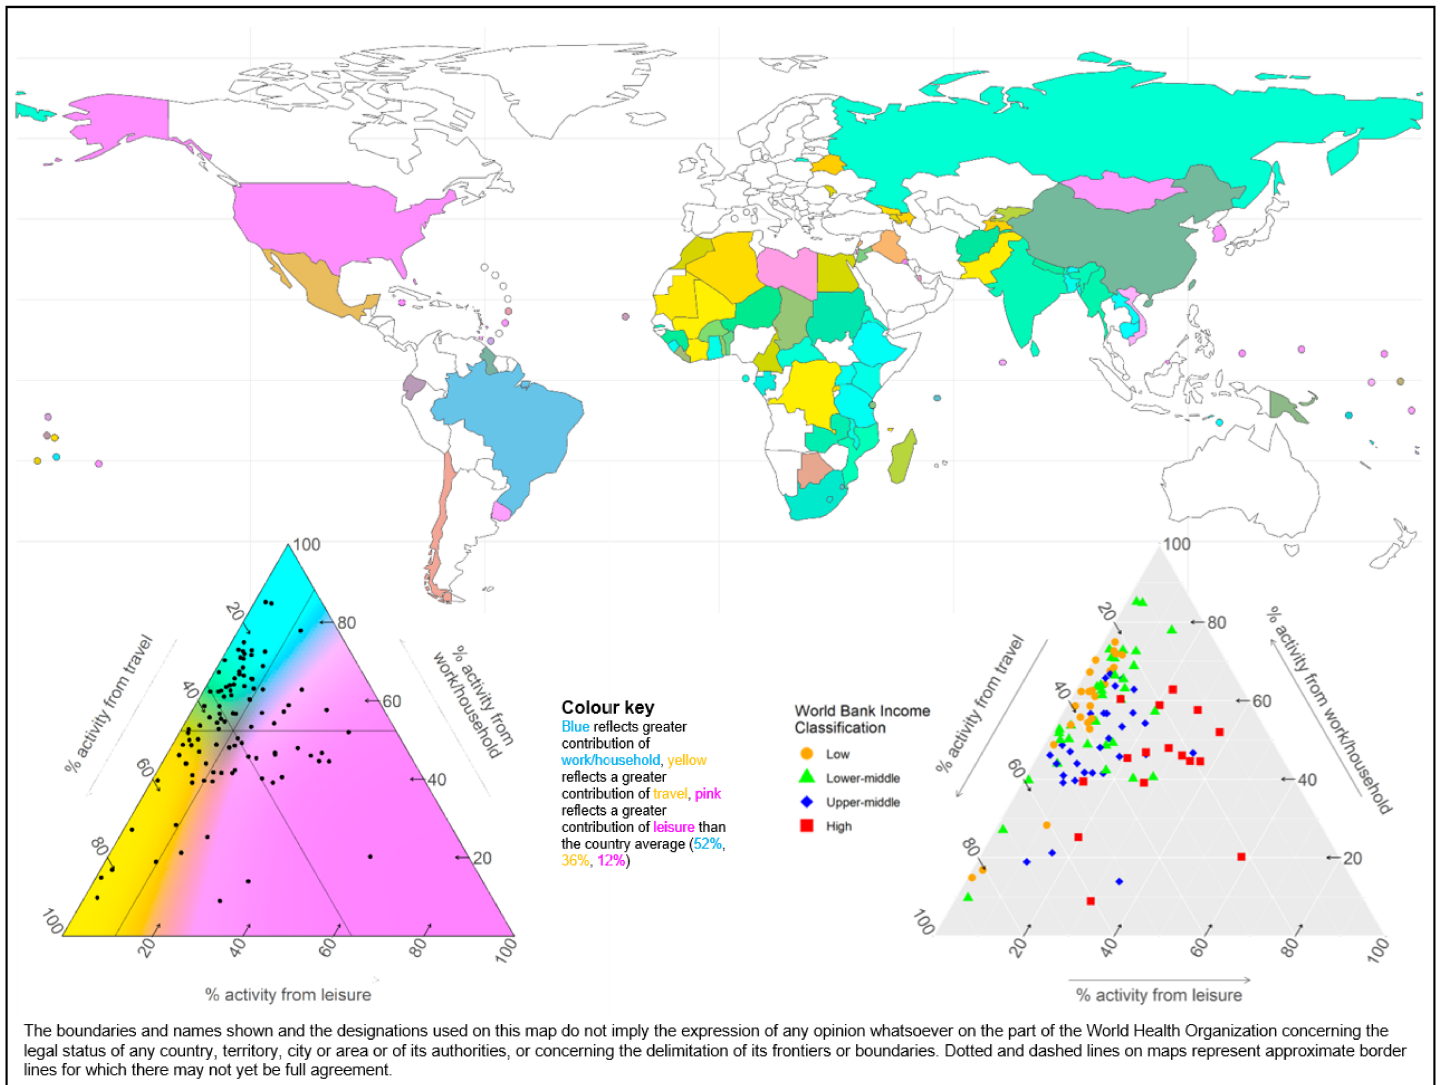

Supplement: bjsports-2020-102601supp007_data_supplement.pdf [file bjsports-2020-102601supp007_data_supplement.pdf]
